# Supplementary material for: Labilization and diversification of pyrogenic dissolved organic matter by microbes
Source: Copernicus journal article supplement (doi:10.5194/bg-2021-23), 2021-05-12
Supplement: Supplementary file 3 [file bg-2021-23-supplement.pdf]

# 1 Labilization and diversification of pyrogenic dissolved organic matter by 2 microbes

3  
4 Aleksandar I. Goranov<sup>1,\*</sup>, Andrew S. Wozniak<sup>2</sup>, Kyle W. Bostick<sup>3,†</sup>, Andrew R. Zimmerman<sup>3</sup>, Siddhartha  
5 Mitra<sup>4</sup>, and Patrick G. Hatcher<sup>1</sup>

6  
7 <sup>1</sup>Department of Chemistry and Biochemistry, Old Dominion University, Norfolk, VA, USA

8 <sup>2</sup>School of Marine Science and Policy, College of Earth, Ocean, and Environment, University of Delaware, ewes, DE, USA

9 <sup>3</sup>Department of Geological Sciences, University of Florida, Gainesville, FL, USA

10 <sup>4</sup>Department of Geological Sciences, East Carolina University, Greenville, NC, USA

11  
12 *Correspondence to:* Patrick G. Hatcher ([phatcher@odu.edu](mailto:phatcher@odu.edu))

## 18 Supplement

### 21 Table of Contents

|    |                                                                                                             |    |
|----|-------------------------------------------------------------------------------------------------------------|----|
| 22 | <b>Section 1.</b> Chromophoric dissolved organic matter (CDOM) (Fig. S1) .....                              | 2  |
| 23 | <b>Section 2.</b> Presence/Absence analysis of FT-ICR-MS data (Figs. S2-4) .....                            | 3  |
| 24 | <b>Section 3.</b> H/C versus Molecular Weight analysis (Figs. S5-8) .....                                   | 6  |
| 25 | <b>Section 4.</b> Bio-resistant formulas evaluation (Fig. S9).....                                          | 10 |
| 26 | <b>Section 5.</b> Comparison of bio-produced formulas with marine DOM samples (Table S1) .....              | 11 |
| 27 | <b>Section 6.</b> Analysis of Variance (ANOVA) of bio-produced peptide-like organic matter (Table S2) ..... | 12 |
| 28 | <b>Section 7.</b> Peptide sequences (Table S3).....                                                         | 13 |
| 29 | <b>Section 8.</b> Kendrick Mass Defect analysis plots of bio-produced formulas (Fig. S10-12) .....          | 15 |
| 30 | <b>Section 9.</b> Correlation analysis (Table S4).....                                                      | 18 |
| 31 | <b>References</b> .....                                                                                     | 19 |

32  

---

<sup>\*</sup> Current Address: Department of Earth and Environmental Sciences, Rensselaer Polytechnic Institute, Troy, NY, USA

<sup>†</sup> Current Address: Fugro GeoServices, 6100 Hillcroft Avenue, Houston, TX, USA

33  
34

### Section 1. Chromophoric dissolved organic matter (CDOM)

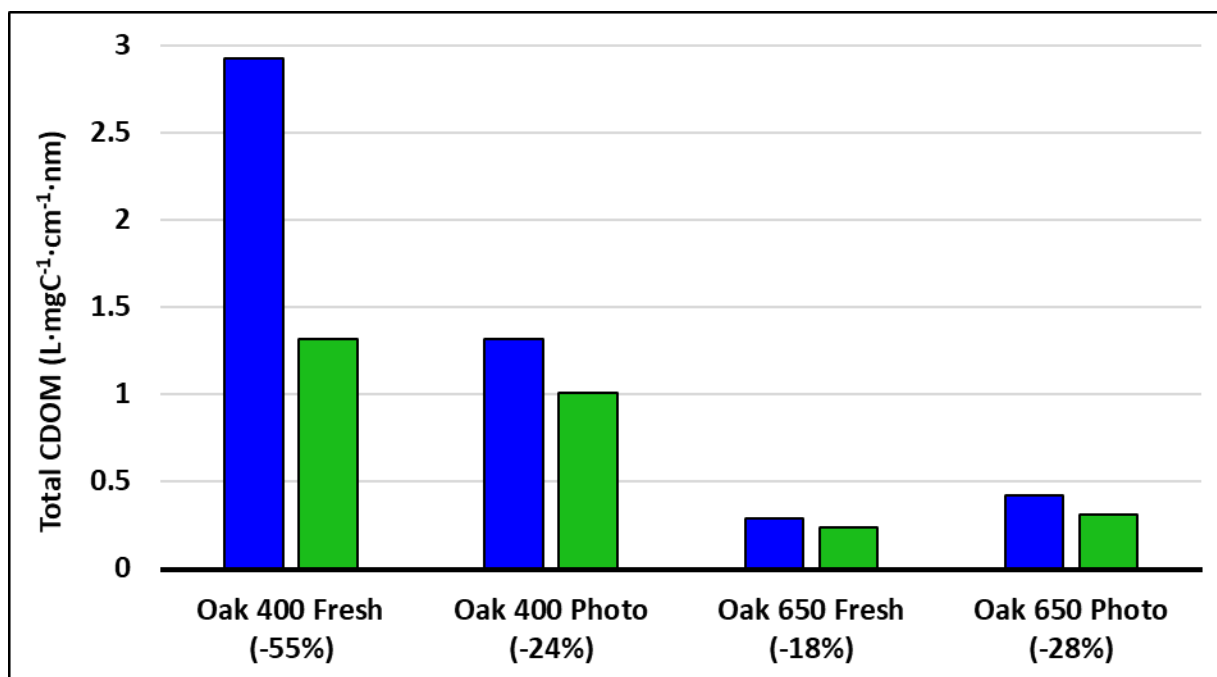

35  
36  
37  
38  
39

**Figure S1.** Total chromophoric (colored) dissolved organic matter (CDOM) content of pyDOM leachates before (blue) and after (green) 10-day biotic incubations. Total CDOM content is reported as the integrated carbon-normalized absorbance from 250 – 450 nm (Helms et al., 2008). The percent loss of CDOM for each leachate is shown as percentage under the label of each leachate.

40  
41  
42  
43  
44  
45  
46  
47  
48  
49  
50  
51  
52  
53  
54  
55  
56  
57  
58  
59  
60  
61  
62  
63

64  
65

## Section 2. Presence/Absence analysis of FT-ICR-MS data

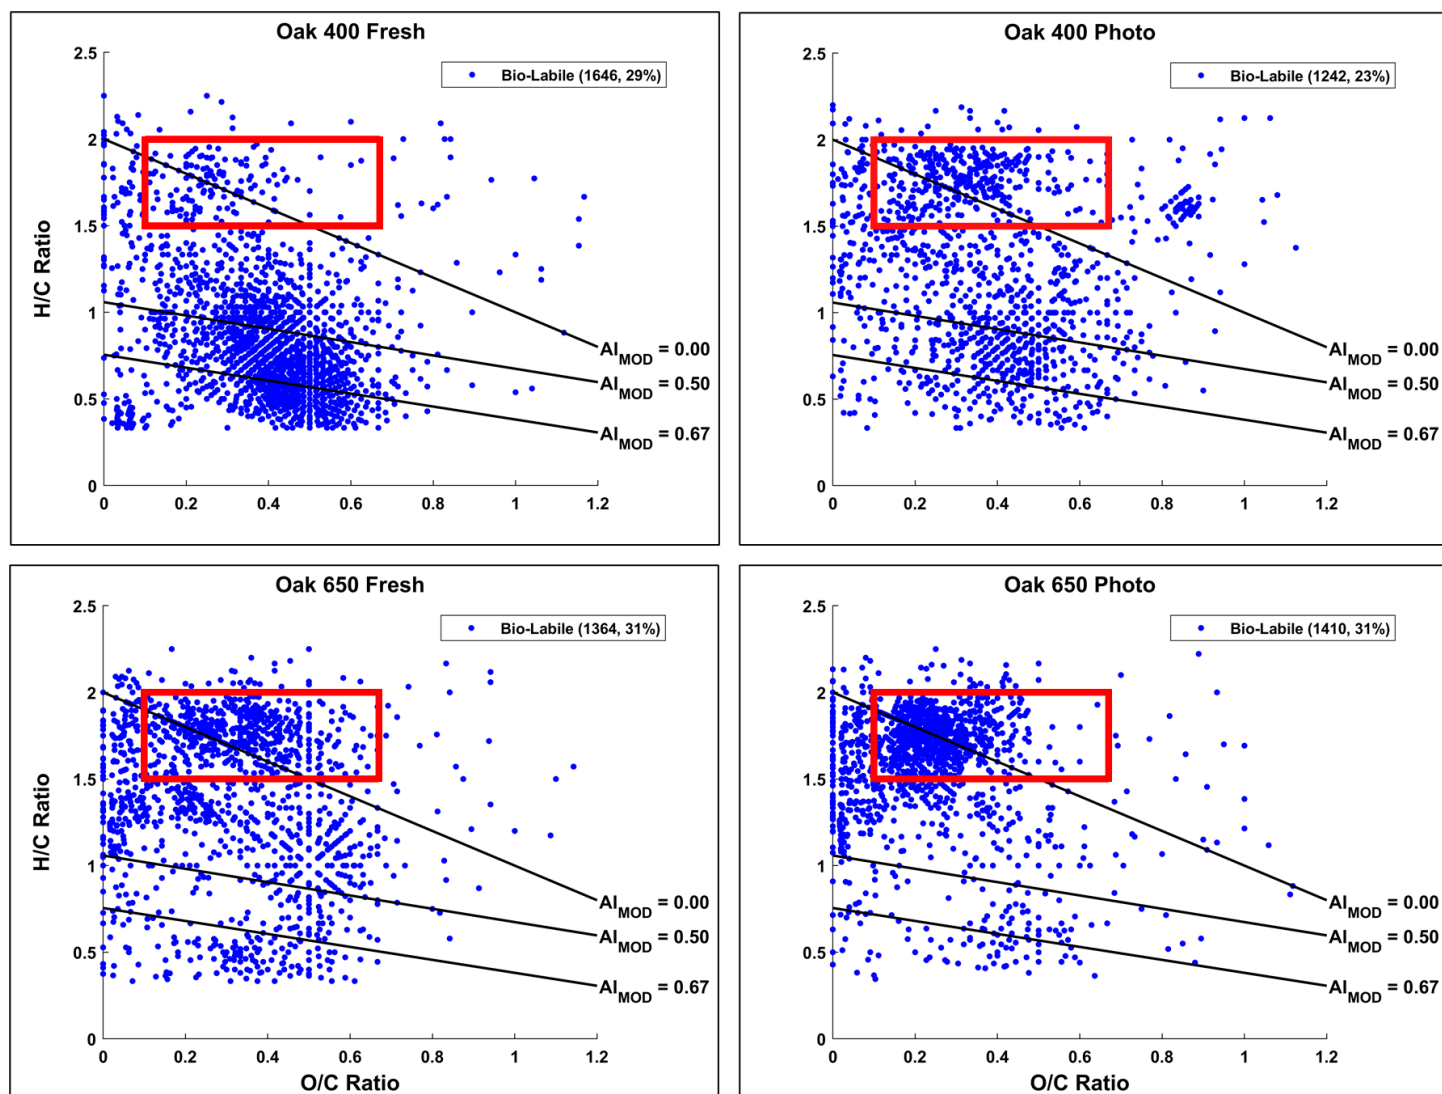

66  
67  
68  
69  
70  
71  
72  
73  
74  
75  
76  
77  
78  
79  
80  
81  
82  
83  
84

**Figure S2.** Van Krevelen diagrams of **bio-labile** formulas identified in the four pyDOM samples using presence/absence approach (Sleighter et al., 2012). The number of formulas and the corresponding percentage (relative to total number of formulas in the two samples being compared) are shown in the legends. The black lines indicate modified aromaticity index cutoffs (AI<sub>MOD</sub>; Koch and Dittmar, 2006, 2016), and the red box indicates the peptide region (valid only for N-containing formulas).

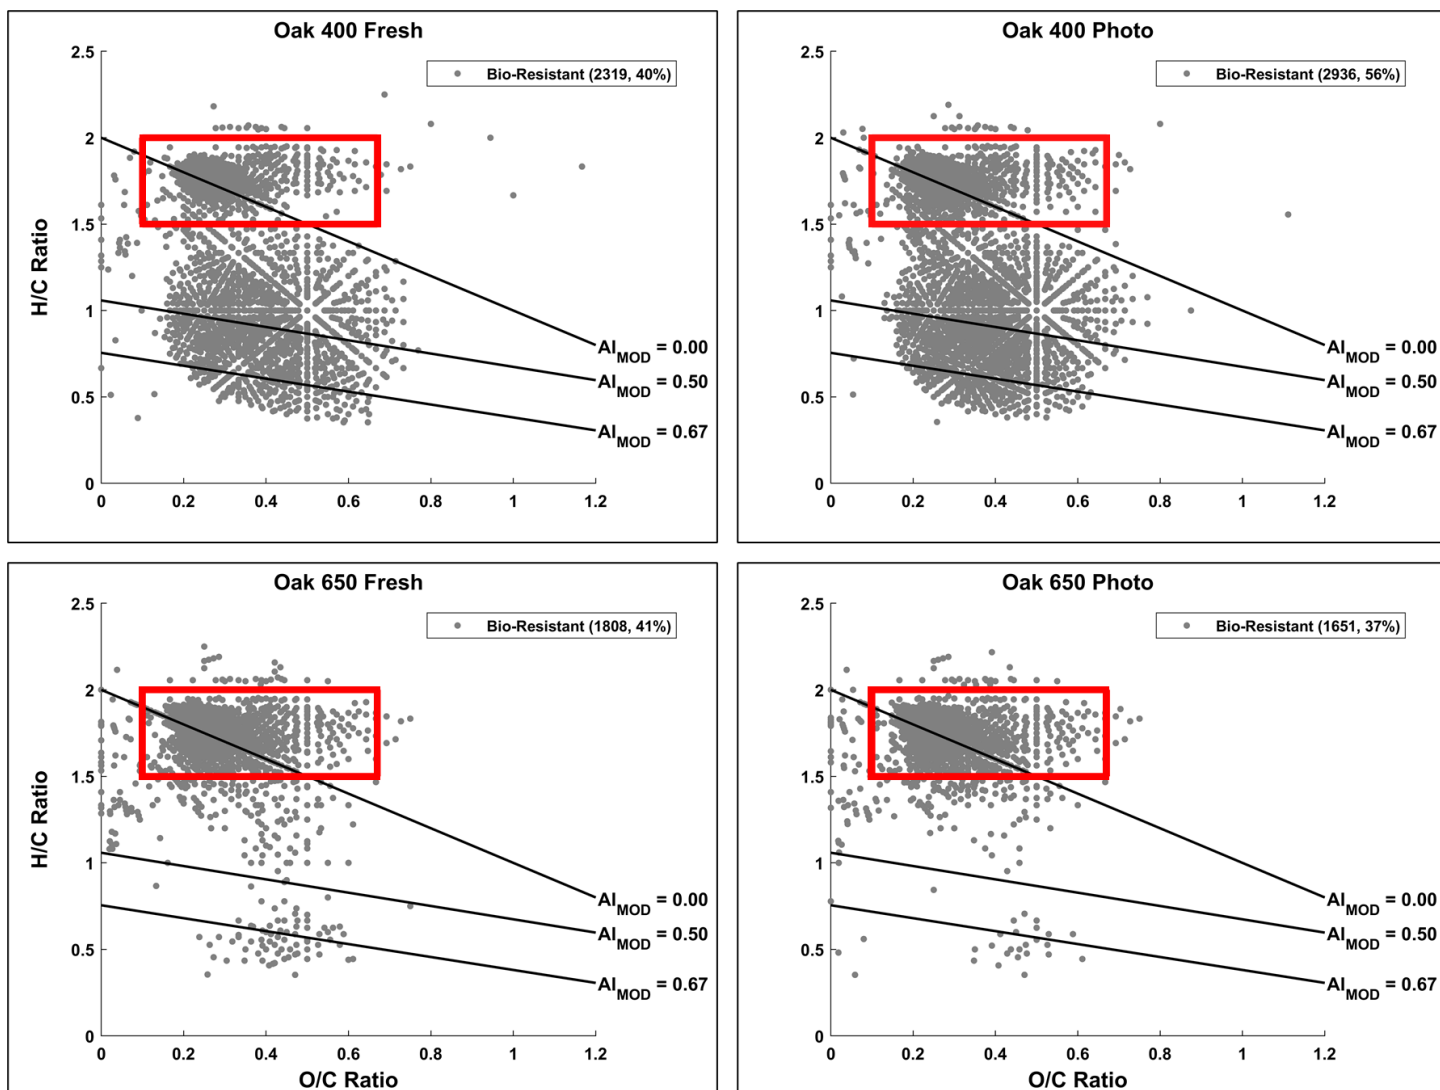

85 **Figure S3.** Van Krevelen diagrams of **bio-resistant** formulas identified in the four pyDOM samples using  
 86 presence/absence approach (Sleighter et al., 2012). The number of formulas and the corresponding percentage  
 87 (relative to total number of formulas in the two samples being compared) are shown in the legends. The black  
 88 lines indicate modified aromaticity index cutoffs ( $AI_{MOD}$ ; Koch and Dittmar, 2006, 2016), and the red box  
 89 indicates the peptide region (valid only for N-containing formulas).  
 90

91  
92  
93  
94  
95  
96  
97  
98  
99  
100  
101  
102  
103  
104  
105

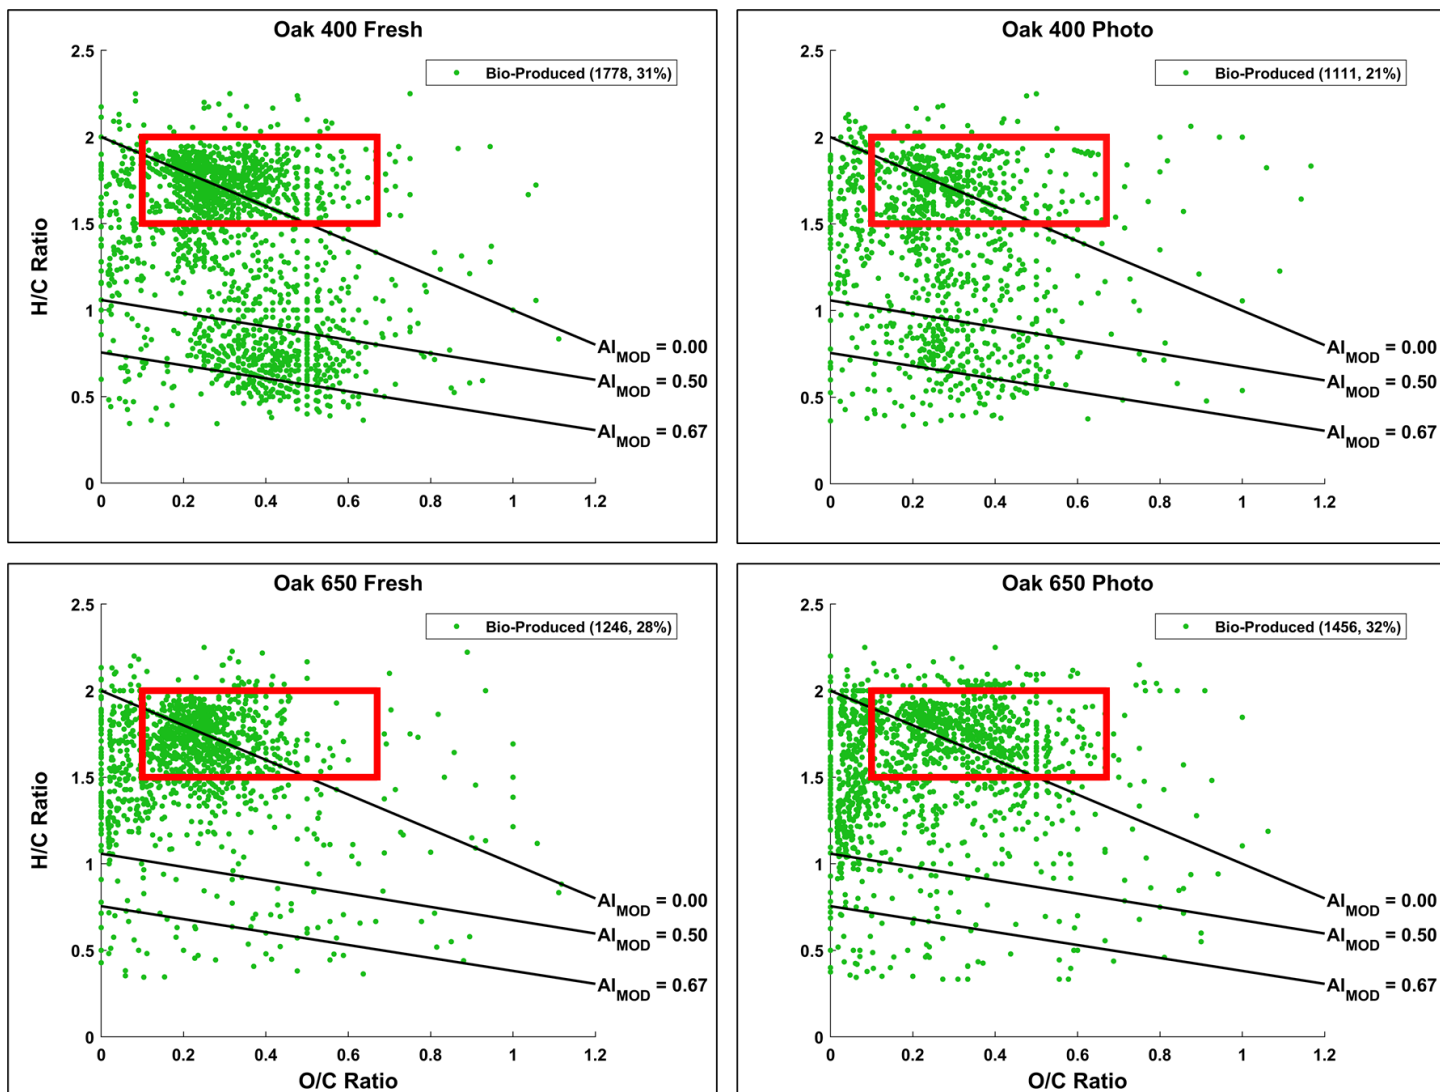

106 **Figure S4.** Van Krevelen diagrams of **bio-produced** formulas identified in pyDOM samples using  
 107 presence/absence approach (Sleighter et al., 2012). The number of formulas and the corresponding percentage  
 108 (relative to total number of formulas in the two samples being compared) are shown in the legends. The black  
 109 lines indicate modified aromaticity index cutoffs (AI<sub>MOD</sub>; Koch and Dittmar, 2006, 2016), and the red box  
 110 indicates the peptide region (valid only for N-containing formulas).  
 111



125  
126

### Section 3. H/C versus Molecular Weight analysis

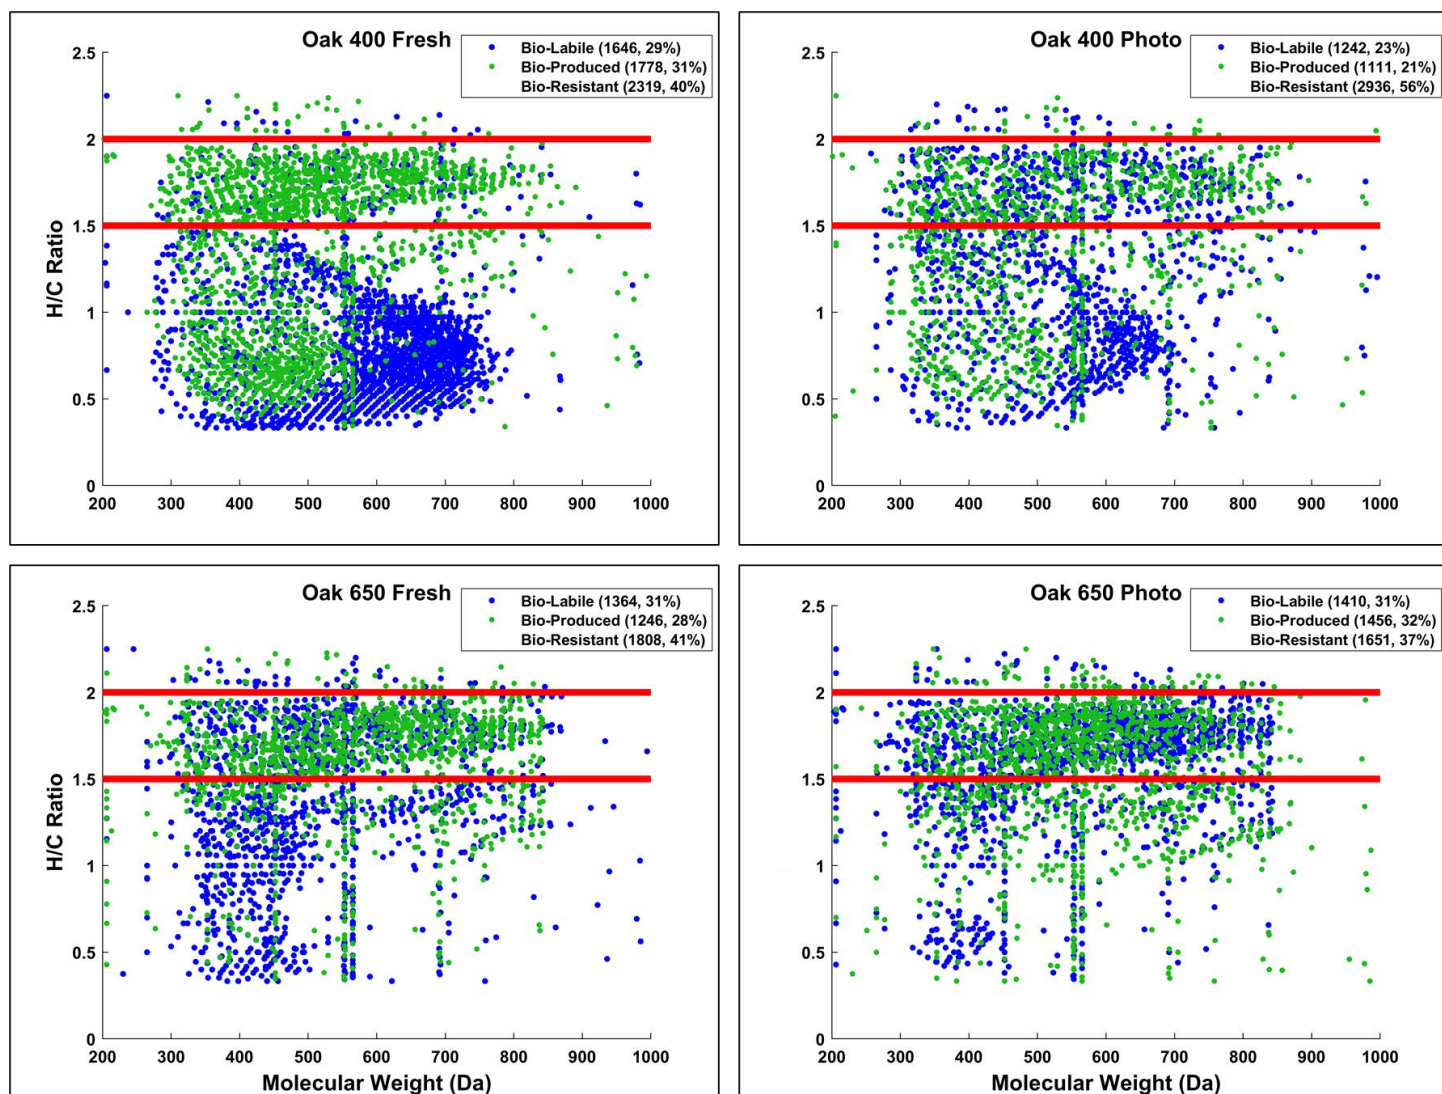

127  
128  
129  
130  
131  
132  
133  
134

**Figure S5.** Hydrogen-to-carbon (H/C) ratio versus molecular weight plots of microbially incubated pyDOM leachates. Formulas are classified as **bio-labile** (molecular formulas only found in the “killed” control (Fresh or Photo) pyDOM leachates) and **bio-produced** (formulas that are only found in the bio-incubated samples). Formulas that are present in both the “killed” control and bio-incubated samples are operationally classified as bio-resistant and not shown for clarity. These classes are also individually plotted on Figs. S6-8. The number of formulas of each of these pools is shown in the legends (along with corresponding percentages). The red lines indicate where peptide-like formulas would plot.

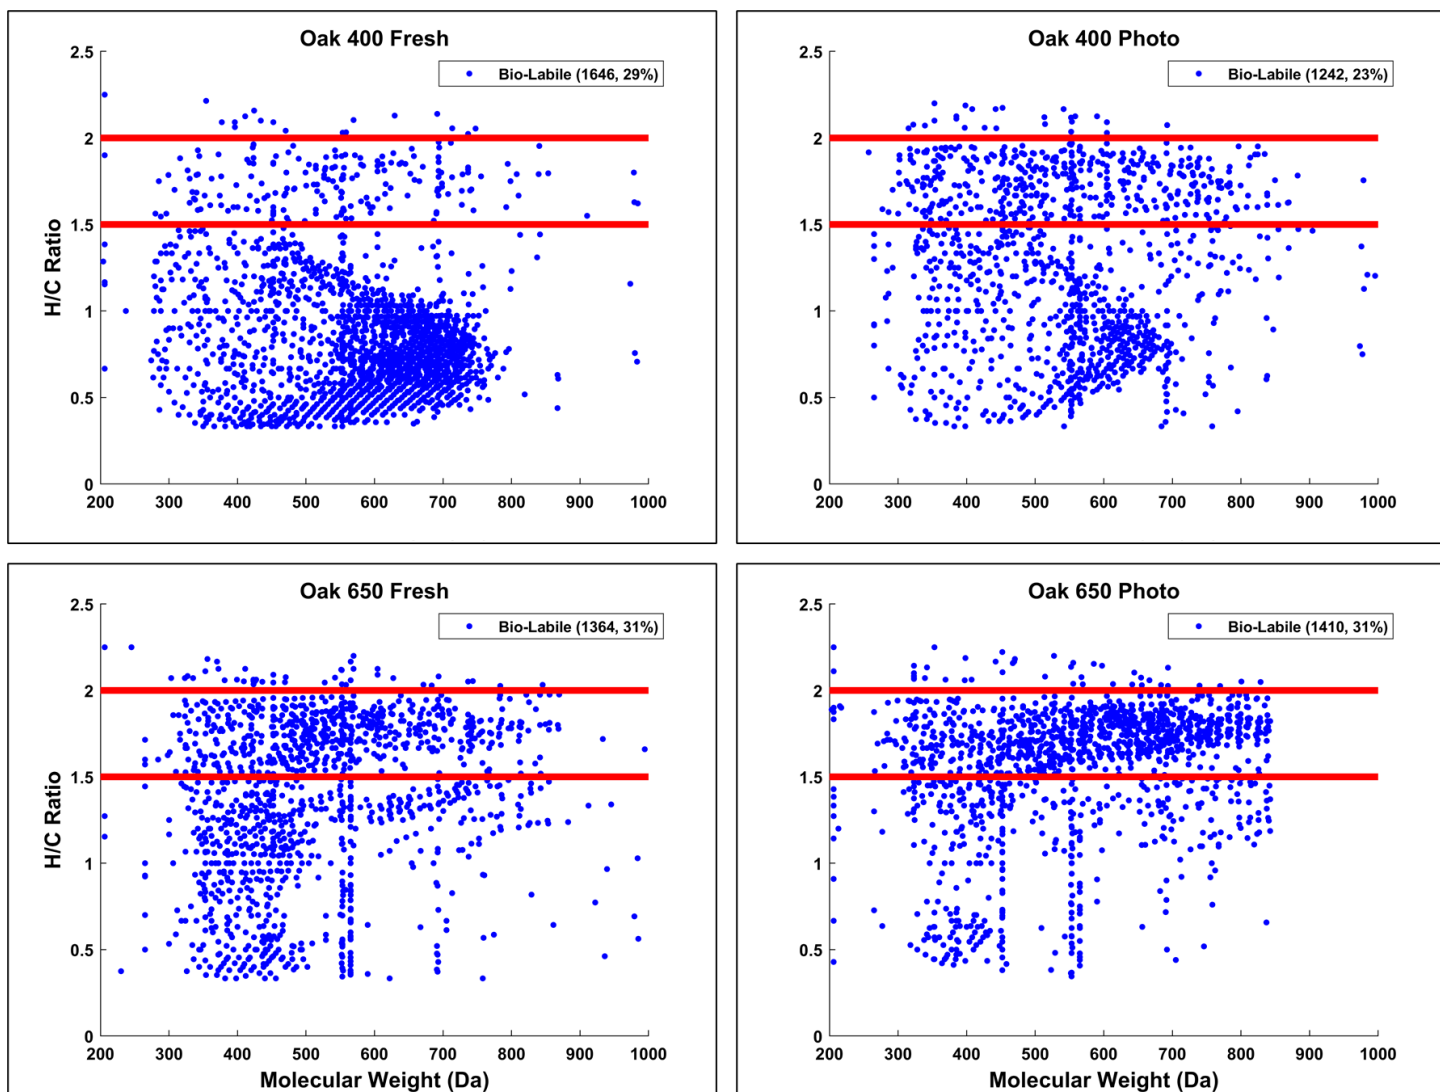

135  
136  
137  
138

**Figure S6.** Hydrogen-to-carbon (H/C) ratio versus molecular weight plots of the **bio-labile** formulas. The number of formulas and the corresponding percentage (relative to total number of formulas in the two samples being compared) are shown in the legends. The red lines indicate where peptide-like formulas would plot.

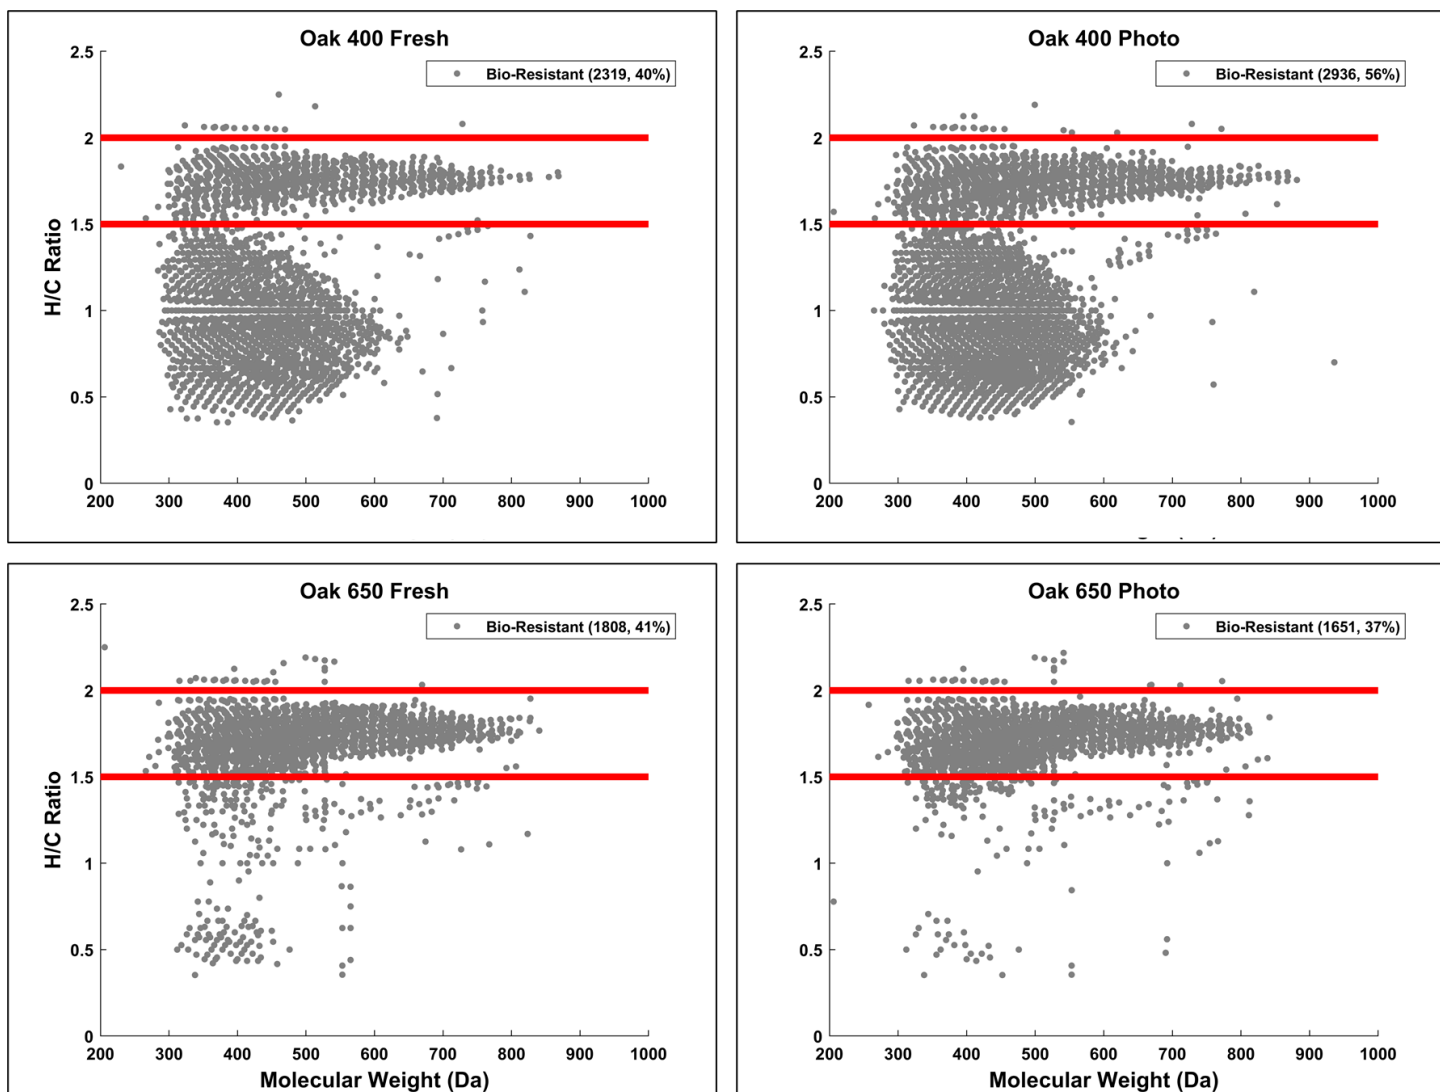

**Figure S7.** Hydrogen-to-carbon (H/C) ratio versus molecular weight plots of the **bio-resistant** formulas. The number of formulas and the corresponding percentage (relative to total number of formulas in the two samples being compared) are shown in the legends. The red lines indicate where peptide-like formulas would plot.

139  
140  
141  
142  
143  
144  
145  
146  
147  
148  
149  
150  
151  
152  
153  
154  
155  
156  
157  
158  
159



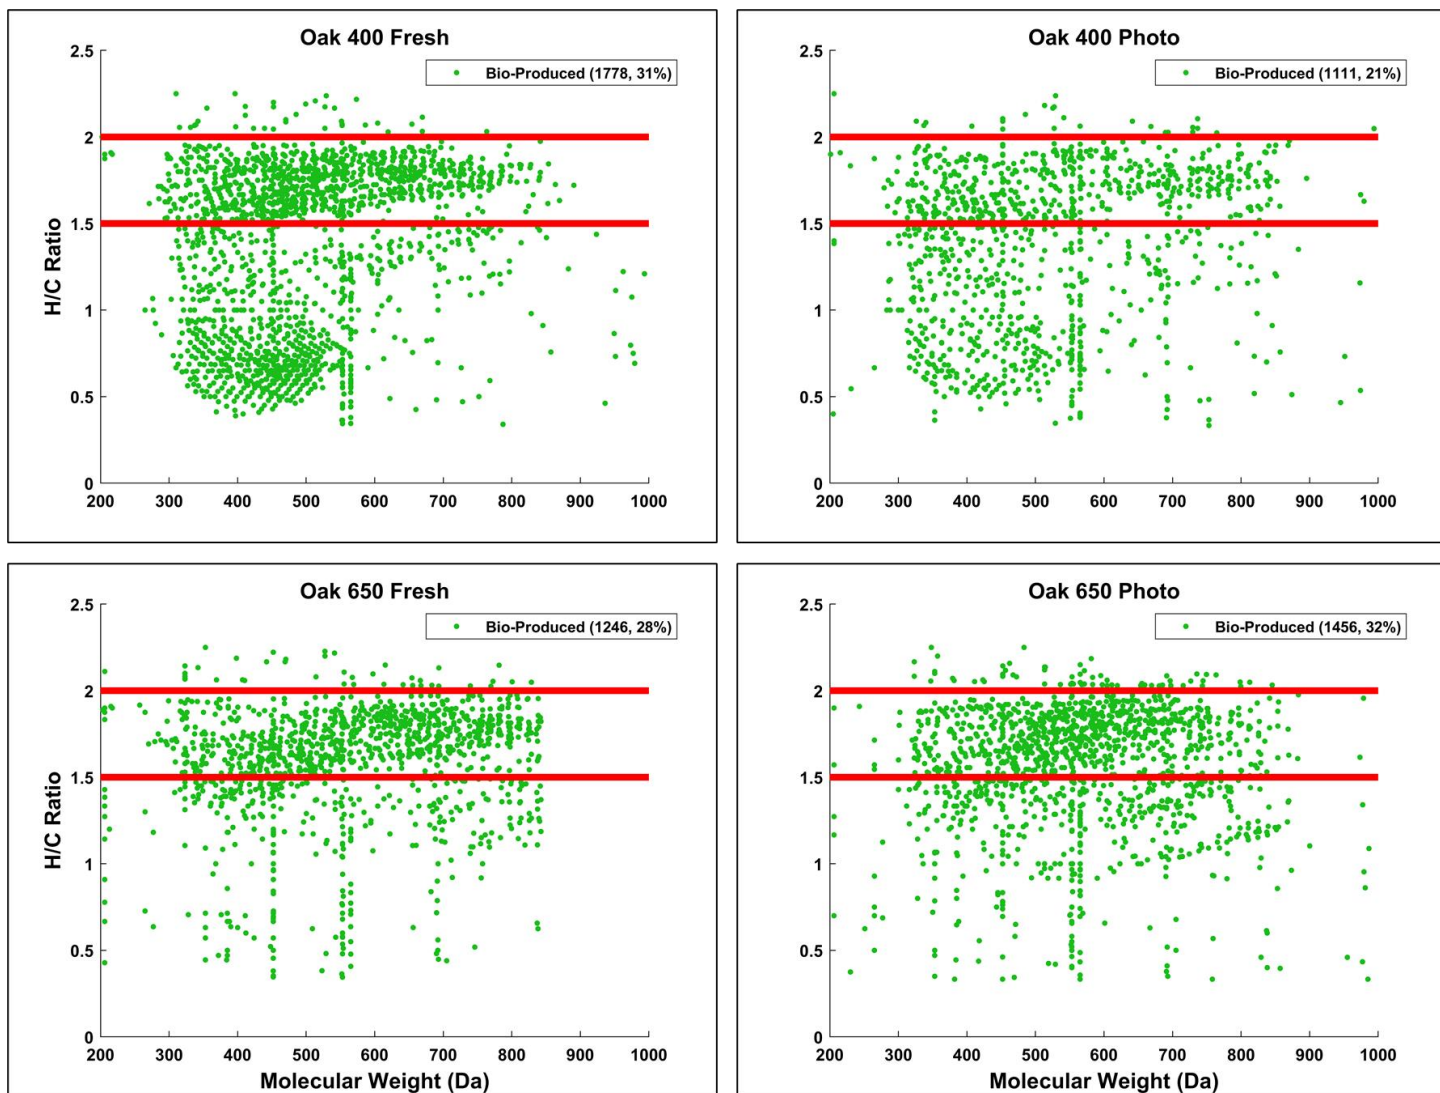

161

162

**Figure S8.** Hydrogen-to-carbon (H/C) ratio versus molecular weight plots of the **bio-produced** formulas. The number of formulas and the corresponding percentage (relative to total number of formulas in the two samples being compared) are shown in the legends. The red lines indicate where peptide-like formulas would plot.

165

166

167

168

169

170

171

172

173

174

175

176

177

178

179  
180

#### Section 4. Bio-resistant formulas evaluation

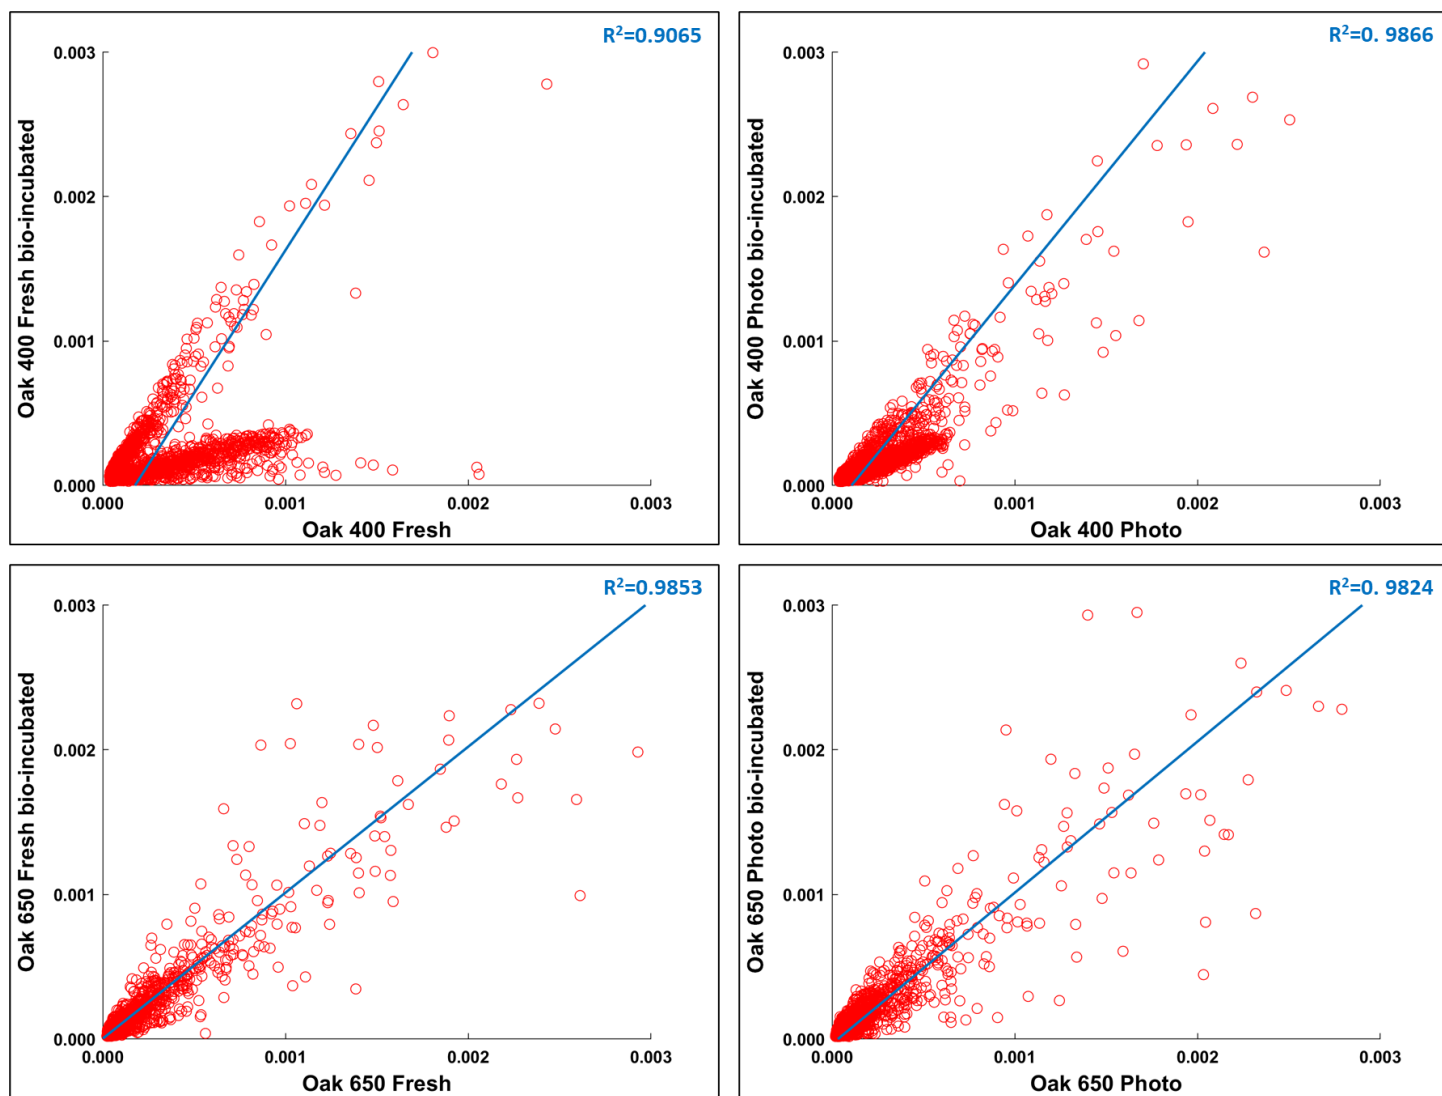

181  
182  
183  
184  
185  
186  
187  
188  
189  
190  
191  
192  
193  
194  
195  
196  
197

**Figure S9.** Abundance scatterplots of the bio-resistant formulas following Sleighter et al. (2012). This approach evaluates the similarity in relative abundance of each common formula among the control and its corresponding bio-incubated sample. A high  $R^2$  value indicates a high similarity in the abundance of these formulas.

**Section 5.** Comparison of bio-produced formulas with marine DOM samples

For this analysis, the bio-produced formulas after the four pyDOM incubations were combined into one master mass list (total of 4762 formulas). These formulas were searched in previously published molecular data to test whether or not biotic incubations of pyDOM produced marine-like DOM.

**Table S1.** Overlap of bio-produced formulas of pyDOM with marine DOM samples.

| Sample Name                           | Number of Formulas | Number of formulas in common with all bio-produced formulas of pyDOM |
|---------------------------------------|--------------------|----------------------------------------------------------------------|
| <b>DS<sup>a</sup></b>                 | 1752               | 4 (~0%)                                                              |
| <b>GB<sup>a</sup></b>                 | 1727               | 6 (~0%)                                                              |
| <b>TP<sup>a</sup></b>                 | 1303               | 4 (~0%)                                                              |
| <b>CCB<sup>a</sup></b>                | 1079               | 4 (~0%)                                                              |
| <b>OSC<sup>a</sup></b>                | 1189               | 4 (~0%)                                                              |
| <b>DOM411<sup>b</sup></b>             | 2402               | 3 (~0%)                                                              |
| <b>DOM412<sup>b</sup></b>             | 3524               | 6 (~0%)                                                              |
| <b>DOM417<sup>b</sup></b>             | 3312               | 3 (~0%)                                                              |
| <b>DOM 1, RO/ED<sup>c,d</sup></b>     | 1697               | 249 (~5%)                                                            |
| <b>DOM 1 rep, RO/ED<sup>c,d</sup></b> | 1756               | 272 (~6%)                                                            |
| <b>DOM 2, RO/ED<sup>c,d</sup></b>     | 1918               | 223 (~5%)                                                            |
| <b>DOM 2 rep, RO/ED<sup>c,d</sup></b> | 1950               | 219 (~5%)                                                            |
| <b>DOM 3, PPL<sup>d</sup></b>         | 2226               | 223 (~5%)                                                            |
| <b>DOM 3 rep, PPL<sup>d</sup></b>     | 2256               | 235 (~5%)                                                            |
| <b>DOM 4, PPL<sup>d</sup></b>         | 2325               | 246 (~5%)                                                            |
| <b>DOM 4 rep, PPL<sup>d</sup></b>     | 2429               | 244 (~5%)                                                            |

<sup>a</sup>Sleighter and Hatcher (2008)

<sup>b</sup>Unpublished data from samples obtained during the WACS-2 cruise (R/V Knorr) as part of the Western Atlantic Climate Study (WACS).

<sup>c</sup>Chen et al. (2014)

<sup>d</sup>Sleighter et al. (2012)

**Section 6.** Analysis of Variance (ANOVA) of bio-produced peptide-like organic matter by the pyDOM samples, as well as by the sucrose reference sample.

**Table S2.** Molecular metrics of peptide-like bio-produced formulas (N-containing,  $1.5 \leq H/C \leq 2.0$ ,  $0.1 \leq O/C \leq 0.67$ ) found in pyDOM samples after the 10-day incubation. The metrics below are reported as number-weighted mean  $\pm$  standard deviation. The molecular metrics colored in **red** correspond to the means that were found to be significantly different ( $p < 0.05$ ) from at least one of the other four means (evaluation done by ANOVA followed by Scheffé's post-hoc test).

|                                              | Oak 400 Fresh                     | Oak 400 Photo                       | Oak 650 Fresh                        | Oak 650 Photo                       | Sucrose                              |
|----------------------------------------------|-----------------------------------|-------------------------------------|--------------------------------------|-------------------------------------|--------------------------------------|
| Number of bio-produced formulas              | 1778                              | 1111                                | 1246                                 | 1456                                | 1339                                 |
| Number of peptide-like bio-produced formulas | 541 (30%)                         | 261 (23%)                           | 497 (40%)                            | 314 (22%)                           | 160 (12%)                            |
| Number of identified oligopeptides           | 14                                | 5                                   | 11                                   | 18                                  | 2                                    |
| C number                                     | <b><math>28.5 \pm 7.6</math></b>  | $30.9 \pm 10.9$                     | $30.7 \pm 7.6$                       | $30.3 \pm 8.7$                      | $31.7 \pm 9.6$                       |
| H number                                     | <b><math>49.8 \pm 14.4</math></b> | $54 \pm 20.6$                       | $53.7 \pm 14.8$                      | $54 \pm 16.5$                       | $55.4 \pm 18.5$                      |
| O number                                     | $7.8 \pm 2.6$                     | $7.8 \pm 3.2$                       | $7.8 \pm 2.9$                        | <b><math>9.0 \pm 2.8</math></b>     | $7.9 \pm 3.1$                        |
| N number                                     | $2.4 \pm 1.1$                     | <b><math>2.8 \pm 1.3</math></b>     | $2.5 \pm 1.2$                        | $2.4 \pm 1.2$                       | $2.4 \pm 1.3$                        |
| O/C ratio                                    | <b><math>0.28 \pm 0.08</math></b> | $0.26 \pm 0.09$                     | $0.25 \pm 0.08$                      | <b><math>0.31 \pm 0.10</math></b>   | $0.25 \pm 0.08$                      |
| H/C ratio                                    | $1.74 \pm 0.12$                   | $1.74 \pm 0.13$                     | $1.74 \pm 0.13$                      | <b><math>1.78 \pm 0.16</math></b>   | $1.74 \pm 0.14$                      |
| N/C ratio                                    | $0.085 \pm 0.037$                 | <b><math>0.094 \pm 0.045</math></b> | $0.082 \pm 0.038$                    | $0.083 \pm 0.045$                   | $0.078 \pm 0.042$                    |
| H/N ratio                                    | $24.8 \pm 11.4$                   | $23.5 \pm 13.4$                     | $26 \pm 13.2$                        | <b><math>28.6 \pm 16.7</math></b>   | <b><math>29.4 \pm 16</math></b>      |
| O/N ratio                                    | $4.0 \pm 2.2$                     | <b><math>3.5 \pm 2.2</math></b>     | $3.8 \pm 2.5$                        | <b><math>5.1 \pm 3.5</math></b>     | $4.3 \pm 2.7$                        |
| MW <sup>a</sup>                              | <b><math>550 \pm 140</math></b>   | $589 \pm 188$                       | $582 \pm 147$                        | $596 \pm 143$                       | $597 \pm 172$                        |
| DBE <sup>b</sup>                             | $5.81 \pm 1.78$                   | $6.28 \pm 2.17$                     | $6.13 \pm 2.06$                      | <b><math>5.51 \pm 2.59</math></b>   | $6.2 \pm 2.33$                       |
| DBE/C <sup>c</sup>                           | $0.211 \pm 0.065$                 | $0.215 \pm 0.071$                   | $0.206 \pm 0.069$                    | <b><math>0.189 \pm 0.083</math></b> | $0.203 \pm 0.071$                    |
| DBE-O <sup>d</sup>                           | $-2.27 \pm 2.75$                  | $-1.75 \pm 3.52$                    | $-1.90 \pm 3.55$                     | <b><math>-3.82 \pm 4.26</math></b>  | $-1.86 \pm 3.65$                     |
| AI <sub>MOD</sub> <sup>e</sup>               | $0.077 \pm 0.05$                  | $0.090 \pm 0.052$                   | $0.083 \pm 0.049$                    | <b><math>0.089 \pm 0.057</math></b> | <b><math>0.116 \pm 0.049</math></b>  |
| NOSC <sup>f</sup>                            | $-0.929 \pm 0.239$                | $-0.933 \pm 0.259$                  | <b><math>-0.984 \pm 0.227</math></b> | $-0.903 \pm 0.269$                  | <b><math>-1.002 \pm 0.218</math></b> |

<sup>a</sup>Molecular Weight (Da), <sup>b</sup>Double-bond equivalency, <sup>c</sup>Carbon-normalized DBE, <sup>d</sup>Oxygen-corrected DBE

<sup>e</sup>Modified Aromaticity Index, <sup>f</sup>Nominal Oxidation State of Carbon

The proteinaceous formulas in the four samples were evaluated using one-way ANOVA to extract the variability in their composition. Averages of molecular parameters were derived from the formula lists – average number of elements (C, H, O, N), elemental ratios (O/C, H/C, N/C, H/N, O/N), molecular weight, double-bond equivalencies (DBE, DBE/C, DBE-O), modified aromaticity index (AI<sub>MOD</sub>) and nominal oxidation state of carbon (NOSC). While the peptide-like formulas seem similar when plotted in the vK space (Figs. 1 and S3), significant differences ( $p < 0.05$ ) in the means of all molecular parameters were observed. When each metric was evaluated using ANOVA, there was at least one sample among the five being compared that had a significantly different mean. Using Scheffé's post-hoc test, it was observed that it was not the same sample that was statistically different each time, which indicated the vast diversity of bio-produced peptide-like molecules after these five incubations.

**Table S3.** Oligopeptide sequences found in the bio-produced formulas of each pyDOM sample.

| Sample        | Measured m/z | Amino Acid combination <sup>#</sup> | Molecular weight (Da) | Molecular Formula                                             |
|---------------|--------------|-------------------------------------|-----------------------|---------------------------------------------------------------|
| Oak 400 Fresh | 201.1246     | AL                                  | 202.1317              | C <sub>9</sub> H <sub>18</sub> O <sub>3</sub> N <sub>2</sub>  |
| Oak 400 Fresh | 356.2192     | OLL                                 | 357.2264              | C <sub>17</sub> H <sub>31</sub> O <sub>5</sub> N <sub>3</sub> |
| Oak 400 Fresh | 455.2874     | OLLV                                | 456.2948              | C <sub>22</sub> H <sub>40</sub> O <sub>6</sub> N <sub>4</sub> |
| Oak 400 Fresh | 512.3457     | ALLVV                               | 513.3526              | C <sub>25</sub> H <sub>47</sub> O <sub>6</sub> N <sub>5</sub> |
| Oak 400 Fresh | 512.3457     | GLLLV                               | 513.3526              | C <sub>25</sub> H <sub>47</sub> O <sub>6</sub> N <sub>5</sub> |
| Oak 400 Fresh | 512.3457     | VVVVV                               | 513.3526              | C <sub>25</sub> H <sub>47</sub> O <sub>6</sub> N <sub>5</sub> |
| Oak 400 Fresh | 514.3251     | ALLLS                               | 515.3319              | C <sub>24</sub> H <sub>45</sub> O <sub>7</sub> N <sub>5</sub> |
| Oak 400 Fresh | 514.3251     | ALLTV                               | 515.3319              | C <sub>24</sub> H <sub>45</sub> O <sub>7</sub> N <sub>5</sub> |
| Oak 400 Fresh | 514.3251     | GLLLT                               | 515.3319              | C <sub>24</sub> H <sub>45</sub> O <sub>7</sub> N <sub>5</sub> |
| Oak 400 Fresh | 514.3251     | LSVVV                               | 515.3319              | C <sub>24</sub> H <sub>45</sub> O <sub>7</sub> N <sub>5</sub> |
| Oak 400 Fresh | 514.3251     | TVVVV                               | 515.3319              | C <sub>24</sub> H <sub>45</sub> O <sub>7</sub> N <sub>5</sub> |
| Oak 400 Fresh | 526.3607     | ALLLV                               | 527.3683              | C <sub>26</sub> H <sub>49</sub> O <sub>6</sub> N <sub>5</sub> |
| Oak 400 Fresh | 526.3607     | GLLLL                               | 527.3683              | C <sub>26</sub> H <sub>49</sub> O <sub>6</sub> N <sub>5</sub> |
| Oak 400 Fresh | 526.3607     | LVVVV                               | 527.3683              | C <sub>26</sub> H <sub>49</sub> O <sub>6</sub> N <sub>5</sub> |

|               |          |      |          |                                                               |
|---------------|----------|------|----------|---------------------------------------------------------------|
| Oak 400 Photo | 341.2195 | LPX  | 342.2267 | C <sub>16</sub> H <sub>30</sub> O <sub>4</sub> N <sub>4</sub> |
| Oak 400 Photo | 341.2195 | KPV  | 342.2267 | C <sub>16</sub> H <sub>30</sub> O <sub>4</sub> N <sub>4</sub> |
| Oak 400 Photo | 350.1836 | HPV  | 351.1907 | C <sub>16</sub> H <sub>25</sub> O <sub>4</sub> N <sub>5</sub> |
| Oak 400 Photo | 528.3188 | LLWV | 529.3264 | C <sub>28</sub> H <sub>43</sub> O <sub>5</sub> N <sub>5</sub> |
| Oak 400 Photo | 552.3768 | LLPV | 553.3839 | C <sub>28</sub> H <sub>51</sub> O <sub>6</sub> N <sub>5</sub> |

|               |          |       |          |                                                               |
|---------------|----------|-------|----------|---------------------------------------------------------------|
| Oak 650 Fresh | 498.3293 | AALLL | 499.3370 | C <sub>24</sub> H <sub>45</sub> O <sub>6</sub> N <sub>5</sub> |
| Oak 650 Fresh | 498.3293 | ALVVV | 499.3370 | C <sub>24</sub> H <sub>45</sub> O <sub>6</sub> N <sub>5</sub> |
| Oak 650 Fresh | 498.3293 | GLLVV | 499.3370 | C <sub>24</sub> H <sub>45</sub> O <sub>6</sub> N <sub>5</sub> |
| Oak 650 Fresh | 512.3455 | ALLVV | 513.3526 | C <sub>25</sub> H <sub>47</sub> O <sub>6</sub> N <sub>5</sub> |
| Oak 650 Fresh | 512.3455 | GLLLV | 513.3526 | C <sub>25</sub> H <sub>47</sub> O <sub>6</sub> N <sub>5</sub> |
| Oak 650 Fresh | 512.3455 | VVVVV | 513.3526 | C <sub>25</sub> H <sub>47</sub> O <sub>6</sub> N <sub>5</sub> |
| Oak 650 Fresh | 552.3042 | DLLPP | 553.3112 | C <sub>26</sub> H <sub>43</sub> O <sub>8</sub> N <sub>5</sub> |
| Oak 650 Fresh | 552.3042 | ELPPV | 553.3112 | C <sub>26</sub> H <sub>43</sub> O <sub>8</sub> N <sub>5</sub> |
| Oak 650 Fresh | 552.3042 | OOLPV | 553.3112 | C <sub>26</sub> H <sub>43</sub> O <sub>8</sub> N <sub>5</sub> |
| Oak 650 Fresh | 552.3042 | OLUVV | 553.3112 | C <sub>26</sub> H <sub>43</sub> O <sub>8</sub> N <sub>5</sub> |
| Oak 650 Fresh | 552.3042 | LLPUT | 553.3112 | C <sub>26</sub> H <sub>43</sub> O <sub>8</sub> N <sub>5</sub> |

|               |          |       |          |                                                               |
|---------------|----------|-------|----------|---------------------------------------------------------------|
| Oak 650 Photo | 242.1508 | KP    | 243.1583 | C <sub>11</sub> H <sub>21</sub> O <sub>3</sub> N <sub>3</sub> |
| Oak 650 Photo | 342.2034 | OLV   | 343.2107 | C <sub>16</sub> H <sub>29</sub> O <sub>5</sub> N <sub>3</sub> |
| Oak 650 Photo | 356.2190 | OLL   | 357.2264 | C <sub>17</sub> H <sub>31</sub> O <sub>5</sub> N <sub>3</sub> |
| Oak 650 Photo | 552.2676 | ALSTY | 553.2748 | C <sub>25</sub> H <sub>39</sub> O <sub>9</sub> N <sub>5</sub> |
| Oak 650 Photo | 552.2676 | ATTYV | 553.2748 | C <sub>25</sub> H <sub>39</sub> O <sub>9</sub> N <sub>5</sub> |
| Oak 650 Photo | 552.2676 | DOLPP | 553.2748 | C <sub>25</sub> H <sub>39</sub> O <sub>9</sub> N <sub>5</sub> |
| Oak 650 Photo | 552.2676 | DLPUV | 553.2748 | C <sub>25</sub> H <sub>39</sub> O <sub>9</sub> N <sub>5</sub> |

|               |          |       |          |                                                               |
|---------------|----------|-------|----------|---------------------------------------------------------------|
| Oak 650 Photo | 552.2676 | EOPPV | 553.2748 | C <sub>25</sub> H <sub>39</sub> O <sub>9</sub> N <sub>5</sub> |
| Oak 650 Photo | 552.2676 | EPUVV | 553.2748 | C <sub>25</sub> H <sub>39</sub> O <sub>9</sub> N <sub>5</sub> |
| Oak 650 Photo | 552.2676 | GLTTY | 553.2748 | C <sub>25</sub> H <sub>39</sub> O <sub>9</sub> N <sub>5</sub> |
| Oak 650 Photo | 552.2676 | OOOPV | 553.2748 | C <sub>25</sub> H <sub>39</sub> O <sub>9</sub> N <sub>5</sub> |
| Oak 650 Photo | 552.2676 | OOUVV | 553.2748 | C <sub>25</sub> H <sub>39</sub> O <sub>9</sub> N <sub>5</sub> |
| Oak 650 Photo | 552.2676 | OLPUT | 553.2748 | C <sub>25</sub> H <sub>39</sub> O <sub>9</sub> N <sub>5</sub> |
| Oak 650 Photo | 552.2676 | LLUUS | 553.2748 | C <sub>25</sub> H <sub>39</sub> O <sub>9</sub> N <sub>5</sub> |
| Oak 650 Photo | 552.2676 | LFSST | 553.2748 | C <sub>25</sub> H <sub>39</sub> O <sub>9</sub> N <sub>5</sub> |
| Oak 650 Photo | 552.2676 | LUUTV | 553.2748 | C <sub>25</sub> H <sub>39</sub> O <sub>9</sub> N <sub>5</sub> |
| Oak 650 Photo | 552.2676 | FSTTV | 553.2748 | C <sub>25</sub> H <sub>39</sub> O <sub>9</sub> N <sub>5</sub> |
| Oak 650 Photo | 552.2676 | SSYVV | 553.2748 | C <sub>25</sub> H <sub>39</sub> O <sub>9</sub> N <sub>5</sub> |

|         |          |     |          |                                                               |
|---------|----------|-----|----------|---------------------------------------------------------------|
| Sucrose | 340.1880 | OLP | 341.1951 | C <sub>16</sub> H <sub>27</sub> O <sub>5</sub> N <sub>3</sub> |
| Sucrose | 340.1880 | LUV | 341.1951 | C <sub>16</sub> H <sub>27</sub> O <sub>5</sub> N <sub>3</sub> |

#Combinations can be of any order

253  
254  
255  
256  
257  
258  
259  
260  
261  
262  
263  
264  
265  
266  
267  
268  
269  
270  
271  
272  
273  
274  
275  
276  
277  
278  
279  
280  
281  
282  
283  
284  
285  
286



287  
288

## Section 8. Kendrick Mass Defect Analysis Plots of bio-produced formulas

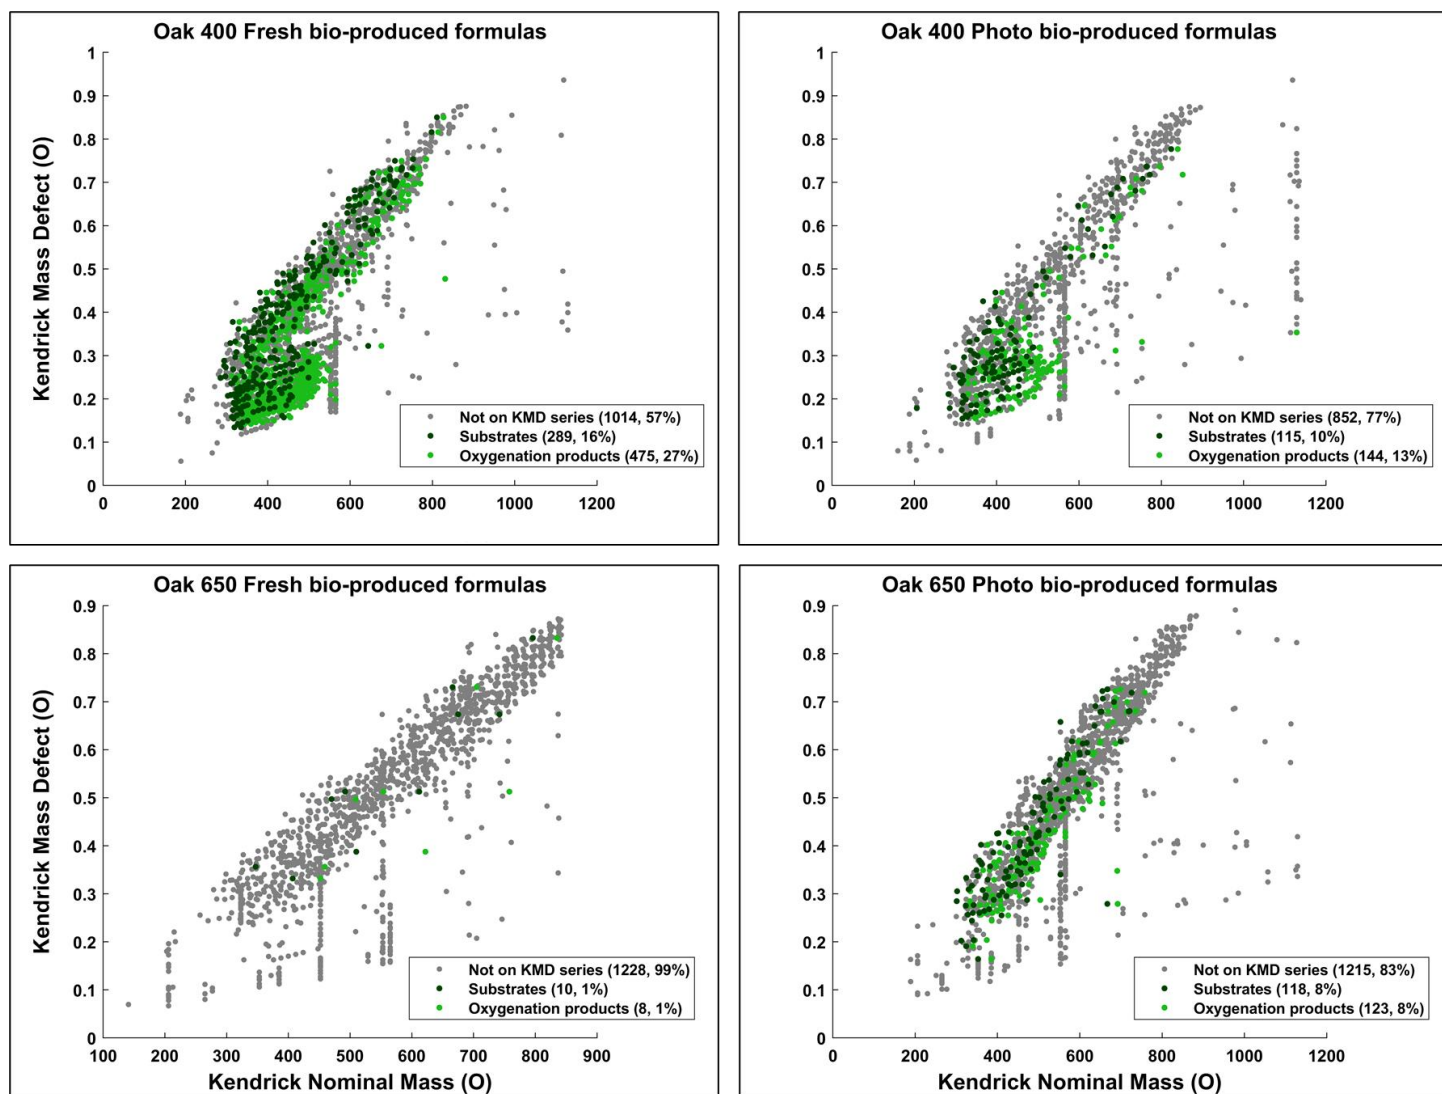

289  
290  
291  
292  
293  
294  
295  
296  
297  
298  
299  
300  
301  
302  
303  
304  
305  
306  
307

**Figure S10.** Kendrick Mass Defect versus Kendrick Nominal Mass plots for the Oxygen (O) series within the bio-produced formulas of the four pyDOM samples. Formulas not part of the O KMD series are colored in **gray**. Formulas in **dark green** are substrates with their oxygenation products colored in **light green**. The number of formulas of each of these pools are shown in the legends (along with corresponding percentages).

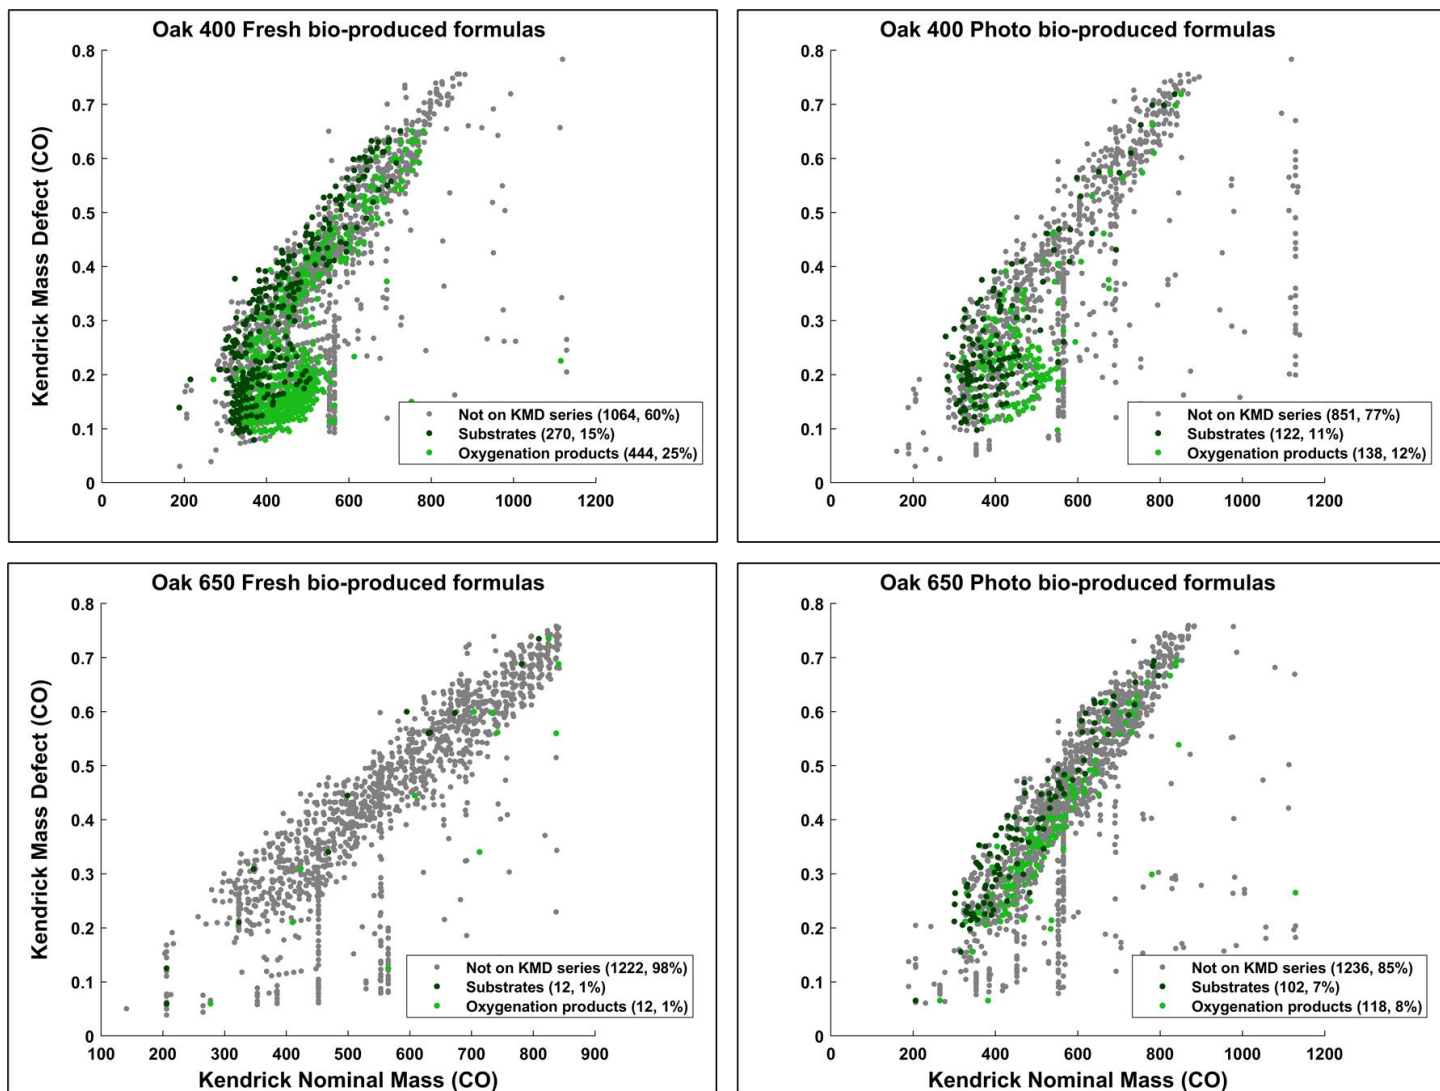

309

310

**Figure S11.** Kendrick Mass Defect versus Kendrick Nominal Mass plots for the Carbonyl (CO) series within the bio-produced formulas of the four pyDOM samples. Formulas not part of the CO KMD series are colored in **gray**. Formulas in **dark green** are substrates with their oxygenation products colored in **light green**. The number of formulas of each of these pools are shown in the legends (along with corresponding percentages).

314

315

316

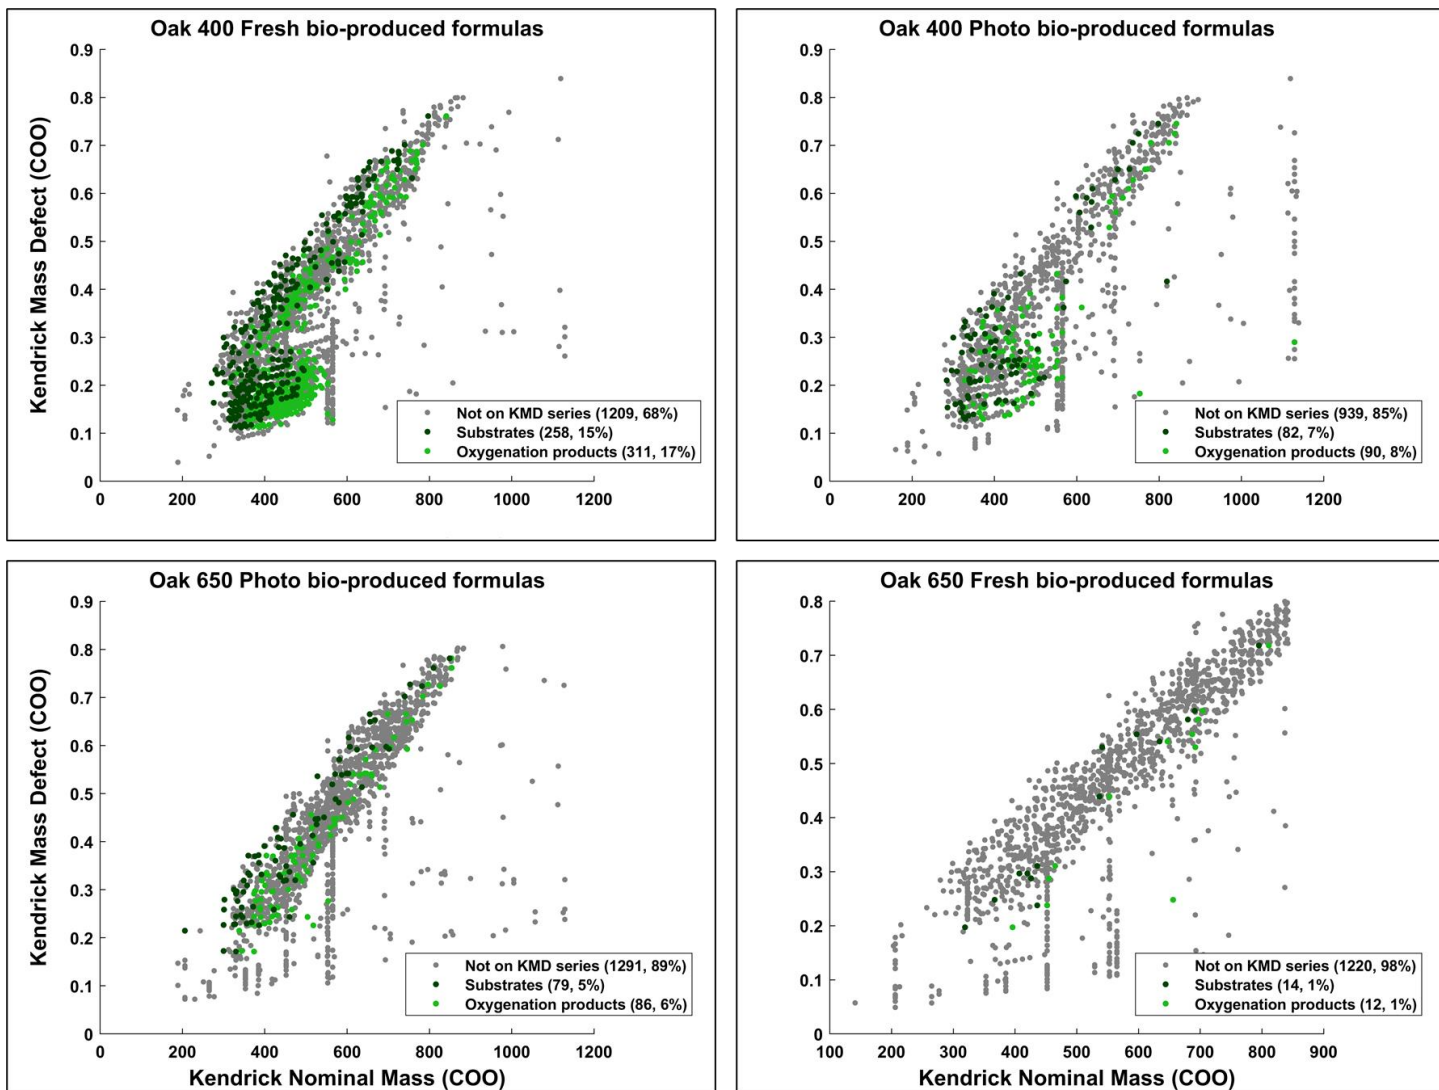

317  
 318 **Figure S12.** Kendrick Mass Defect versus Kendrick Nominal Mass plots for the Carboxyl (COO) series within  
 319 the bio-produced formulas of the four pyDOM samples. Formulas not part of the COO KMD series are colored  
 320 in **gray**. Formulas in **dark green** are substrates with their oxygenation products colored in **light green**. The  
 321 number of formulas of each of these pools are shown in the legends (along with corresponding percentages).  
 322  
 323  
 324  
 325  
 326  
 327  
 328  
 329  
 330  
 331  
 332  
 333  
 334  
 335  
 336

337 **Section 9.** Correlation analysis

338

339 **Table S4.** Data used for the correlation analysis between molecular diversity (as determined by FT-ICR-MS) and  
340 1D NMR (Bostick et al., 2020). Coefficients of determination ( $R^2$  values) are listed for each functional group in  
341 the corresponding color.

|                                                                               | Oak 400 Fresh | Oak 400 Photo | Oak 650 Fresh | Oak 650 Photo |
|-------------------------------------------------------------------------------|---------------|---------------|---------------|---------------|
| <b>Number of bio-labile formulas</b>                                          | 1646          | 1242          | 1364          | 1410          |
| <b>Number of bio-produced formulas</b>                                        | 1778          | 1111          | 1246          | 1456          |
| <b>Aldehyde (O=CH)</b><br>$R^2=0.1263$ , $R^2=0.2374$                         | 3.18%         | 4.52%         | 10.99%        | 4.24%         |
| <b>Aryl</b><br>$R^2=0.0094$ , $R^2=0.0668$                                    | 9.87%         | 8.47%         | 20.65%        | 7.54%         |
| <b>Olefinic (C=C)</b><br>$R^2=0.9472$ , $R^2=0.9978$                          | 7.64%         | 15.60%        | 14.31%        | 11.41%        |
| <b>HC-O-R</b><br>$R^2=0.4217$ , $R^2=0.3385$                                  | 6.75%         | 23.64%        | 4.57%         | 9.41%         |
| <b>HC-C=Y</b><br>$R^2=0.0201$ , $R^2=0.0511$                                  | 12.33%        | 13.14%        | 4.49%         | 9.13%         |
| <b>HC-C-C-X</b><br>$R^2=0.4639$ , $R^2=0.3968$                                | 3.98%         | 5.99%         | 6.52%         | 7.38%         |
| <b>Methylene (CH<sub>2</sub>)</b><br>$R^2=0.1287$ , $R^2=0.0997$              | 6.46%         | 7.85%         | 11.57%        | 12.65%        |
| <b>Methyl (CH<sub>3</sub>)</b><br>$R^2=0.0653$ , $R^2=0.1664$                 | 0.89%         | 0.84%         | 0.25%         | 0.93%         |
| <b>Formate (HCOO<sup>-</sup>)</b><br>$R^2=0.0033$ , $R^2=0.0124$              | 10.57%        | 3.51%         | 24.18%        | 33.91%        |
| <b>Methanol (CH<sub>3</sub>OH)</b><br>$R^2=0.9418$ , $R^2=0.9279$             | 3.69%         | 0.47%         | 0.72%         | 1.31%         |
| <b>Acetate (CH<sub>3</sub>COO<sup>-</sup>)</b><br>$R^2=0.4217$ , $R^2=0.3909$ | 34.63%        | 15.97%        | 1.75%         | 2.10%         |

342

343

344

## References

- 345  
346  
347 Bostick, K. W., Zimmerman, A. R., Goranov, A. I., Mitra, S., Hatcher, P. G., and Wozniak, A. S.: Biolability of  
348 fresh and photodegraded pyrogenic dissolved organic matter from laboratory-prepared chars, ESSOAr  
349 [pre-print], <https://doi.org/10.1002/essoar.10503766.1>, 31 July 2020.
- 350 Chen, H. M., Stubbins, A., Perdue, E. M., Green, N. W., Helms, J. R., Mopper, K., and Hatcher, P. G.: Ultrahigh  
351 resolution mass spectrometric differentiation of dissolved organic matter isolated by coupled reverse  
352 osmosis-electrodialysis from various major oceanic water masses, *Marine Chemistry*, 164, 48-59,  
353 [10.1016/j.marchem.2014.06.002](https://doi.org/10.1016/j.marchem.2014.06.002), 2014.
- 354 Helms, J. R., Stubbins, A., Ritchie, J. D., Minor, E. C., Kieber, D. J., and Mopper, K.: Absorption spectral slopes  
355 and slope ratios as indicators of molecular weight, source, and photobleaching of chromophoric dissolved  
356 organic matter, *Limnology and Oceanography*, 53, 955-969, <https://doi.org/10.4319/lo.2008.53.3.0955>,  
357 2008.
- 358 Koch, B. P., and Dittmar, T.: From mass to structure: An aromaticity index for high-resolution mass data of  
359 natural organic matter, *Rapid Communications in Mass Spectrometry*, 20, 926-932,  
360 <https://doi.org/10.1002/rcm.2386>, 2006.
- 361 Koch, B. P., and Dittmar, T.: From mass to structure: An aromaticity index for high-resolution mass data of  
362 natural organic matter (Erratum), *Rapid Communications in Mass Spectrometry*, 30, 1,  
363 <https://doi.org/10.1002/rcm.7433>, 2016.
- 364 Sleighter, R. L., Chen, H., Wozniak, A. S., Willoughby, A. S., Caricasole, P., and Hatcher, P. G.: Establishing a  
365 measure of reproducibility of ultrahigh-resolution mass spectra for complex mixtures of natural organic  
366 matter, *Analytical Chemistry*, 84, 9184-9191, <https://doi.org/10.1021/ac3018026>, 2012.
- 367 Sleighter, R. L., and Hatcher, P. G.: Molecular characterization of dissolved organic matter (DOM) along a river  
368 to ocean transect of the lower Chesapeake Bay by ultrahigh resolution electrospray ionization Fourier  
369 transform ion cyclotron resonance mass spectrometry, *Marine Chemistry*, 110, 140-152,  
370 [10.1016/j.marchem.2008.04.008](https://doi.org/10.1016/j.marchem.2008.04.008), 2008.

371
